# Supplementary material for: Synthesis and characterization of quaternary La(Sr)S–TaS2 misfit-layered nanotubes
Source: publisher site journal article supplement (doi:10.3762/bjnano.10.111), 2019-05-24
Supplement: Additional file 1 [file 2190-4286-10-111-S1.pdf]

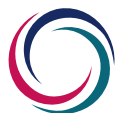

## Supporting Information

for

### **Synthesis and characterization of quaternary La(Sr)S–TaS<sub>2</sub> misfit-layered nanotubes**

Marco Serra, Erumpukuthickal Ashokkumar Anumol, Dalit Stolovas, Iddo Pinkas, Ernesto Joselevich, Reshef Tenne, Andrey Enyashin and Francis Leonard Deepak

*Beilstein J. Nanotechnol.* **2019**, *10*, 1112–1124. doi:10.3762/bjnano.10.111

### **Additional experimental data and calculations**

**Table S1.** Diameter distribution of the tubes

| Sample                                                   | Average Inner Diameter (nm) | Average Outer diameter (nm) | Number of Tubes Analyzed |
|----------------------------------------------------------|-----------------------------|-----------------------------|--------------------------|
| $\text{Sr}_x\text{La}_{1-x}\text{-TaS}_2$<br>(10 at% Sr) | 38                          | 134                         | 18                       |
| $\text{Sr}_x\text{La}_{1-x}\text{-TaS}_2$<br>(20 at% Sr) | 47                          | 133                         | 9                        |
| $\text{Sr}_x\text{La}_{1-x}\text{-TaS}_2$<br>(40 at% Sr) | 78                          | 216                         | 14                       |
| $\text{Sr}_x\text{La}_{1-x}\text{-TaS}_2$<br>(60 at% Sr) | 64                          | 195                         | 12                       |

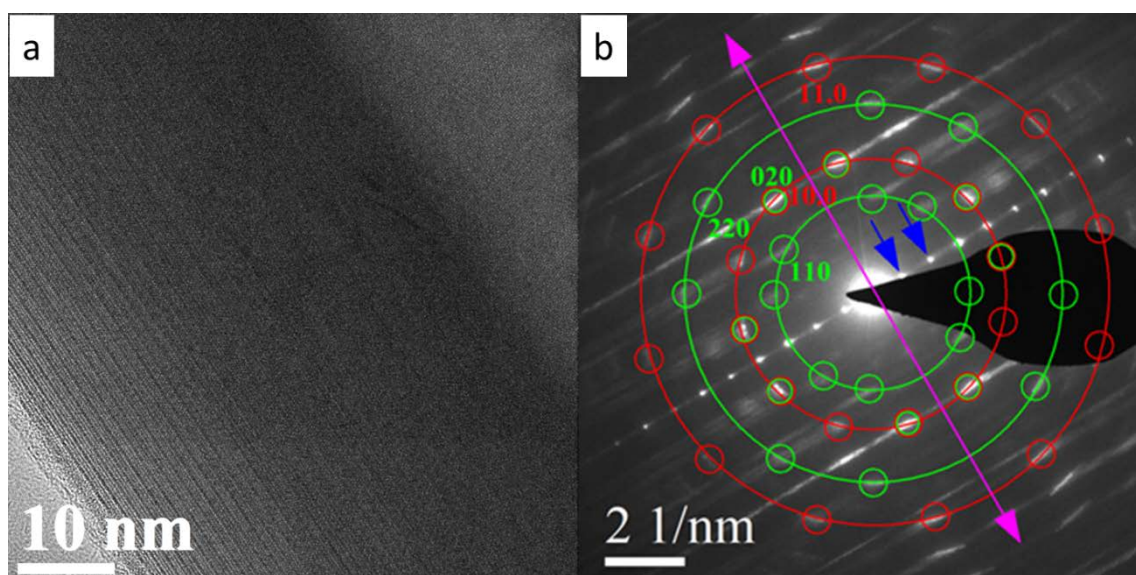

**Figure S1.** a) HRTEM image of a  $\text{Sr}_x\text{La}_{1-x}\text{S-TaS}_2$  (Sr 60 at%) tube, b) Selected area diffraction showing the orientation relationship between  $\text{Sr}_x\text{La}_{1-x}\text{S}$  layers (green) and  $\text{TaS}_2$  layers (red). The tube axis is shown as pink arrow and the basal reflections are marked with blue arrows.

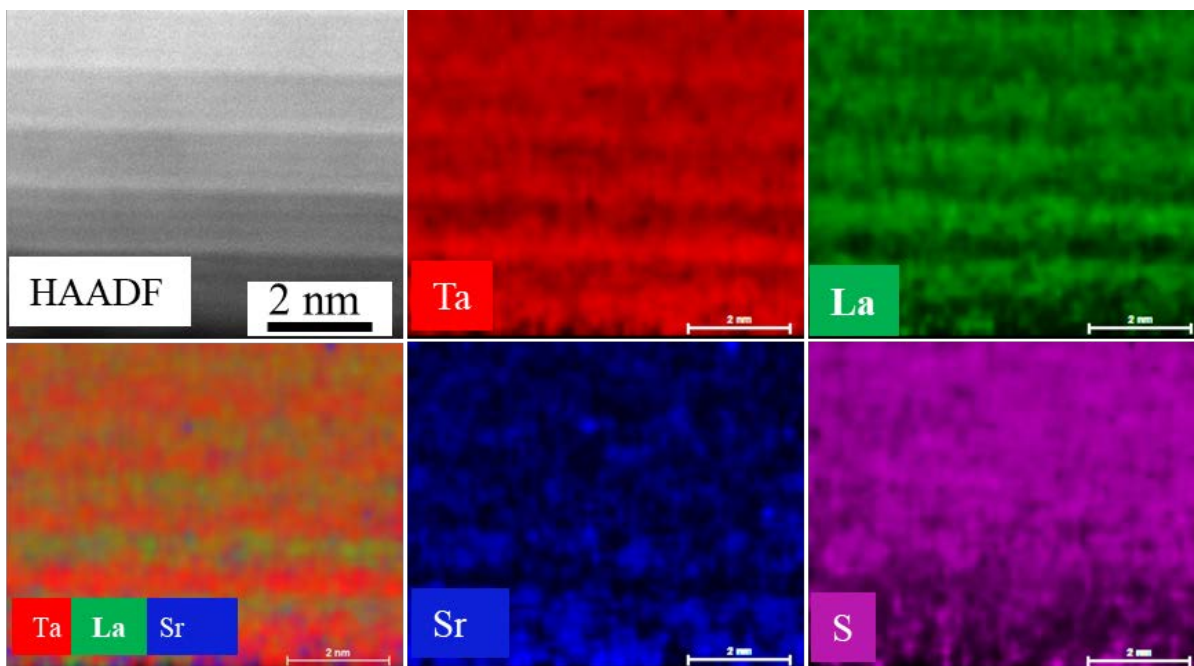

**Figure S2.** HAADF STEM image and EDX elemental mapping on a  $\text{Sr}_x\text{La}_{1-x}\text{S-TaS}_2$  tube synthesized with Sr 60 at% in the precursor.

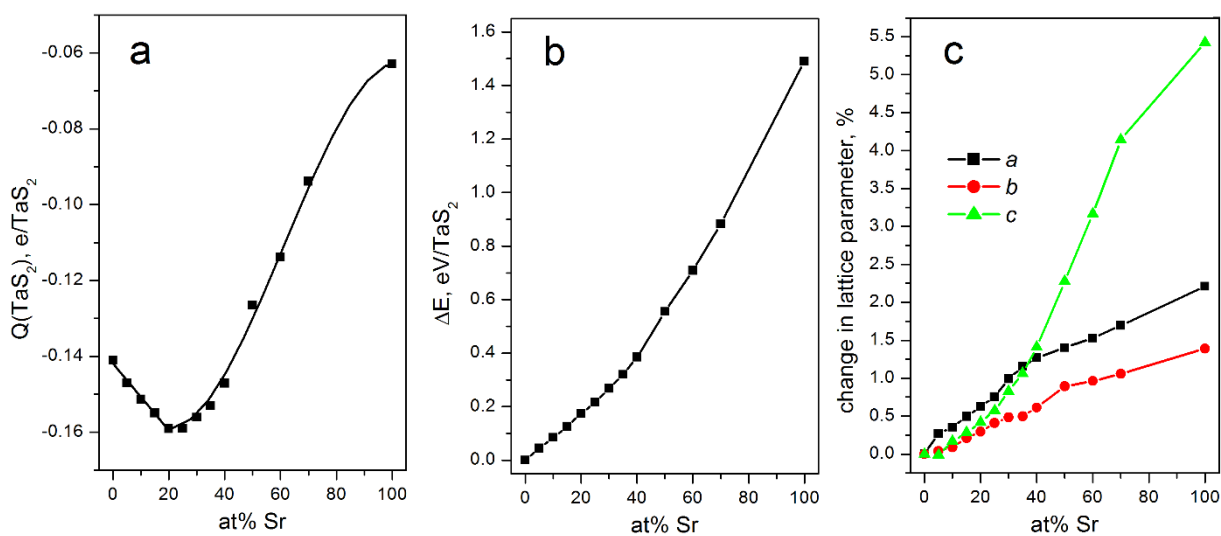

**Figure S3.** (a) The variations in the amount of charge transfer from  $\text{Sr}_x\text{La}_{1-x}\text{S}$  to  $\text{TaS}_2$  within  $\text{Sr}_x\text{La}_{1-x}\text{S-TaS}_2$  misfits ( $Q$ ), (b) the relative formation energies ( $\Delta E$ ) and (c) the lattice parameters ( $a$ ,  $b$ ,  $c$ ), depending on the Sr content. DFT calculations.

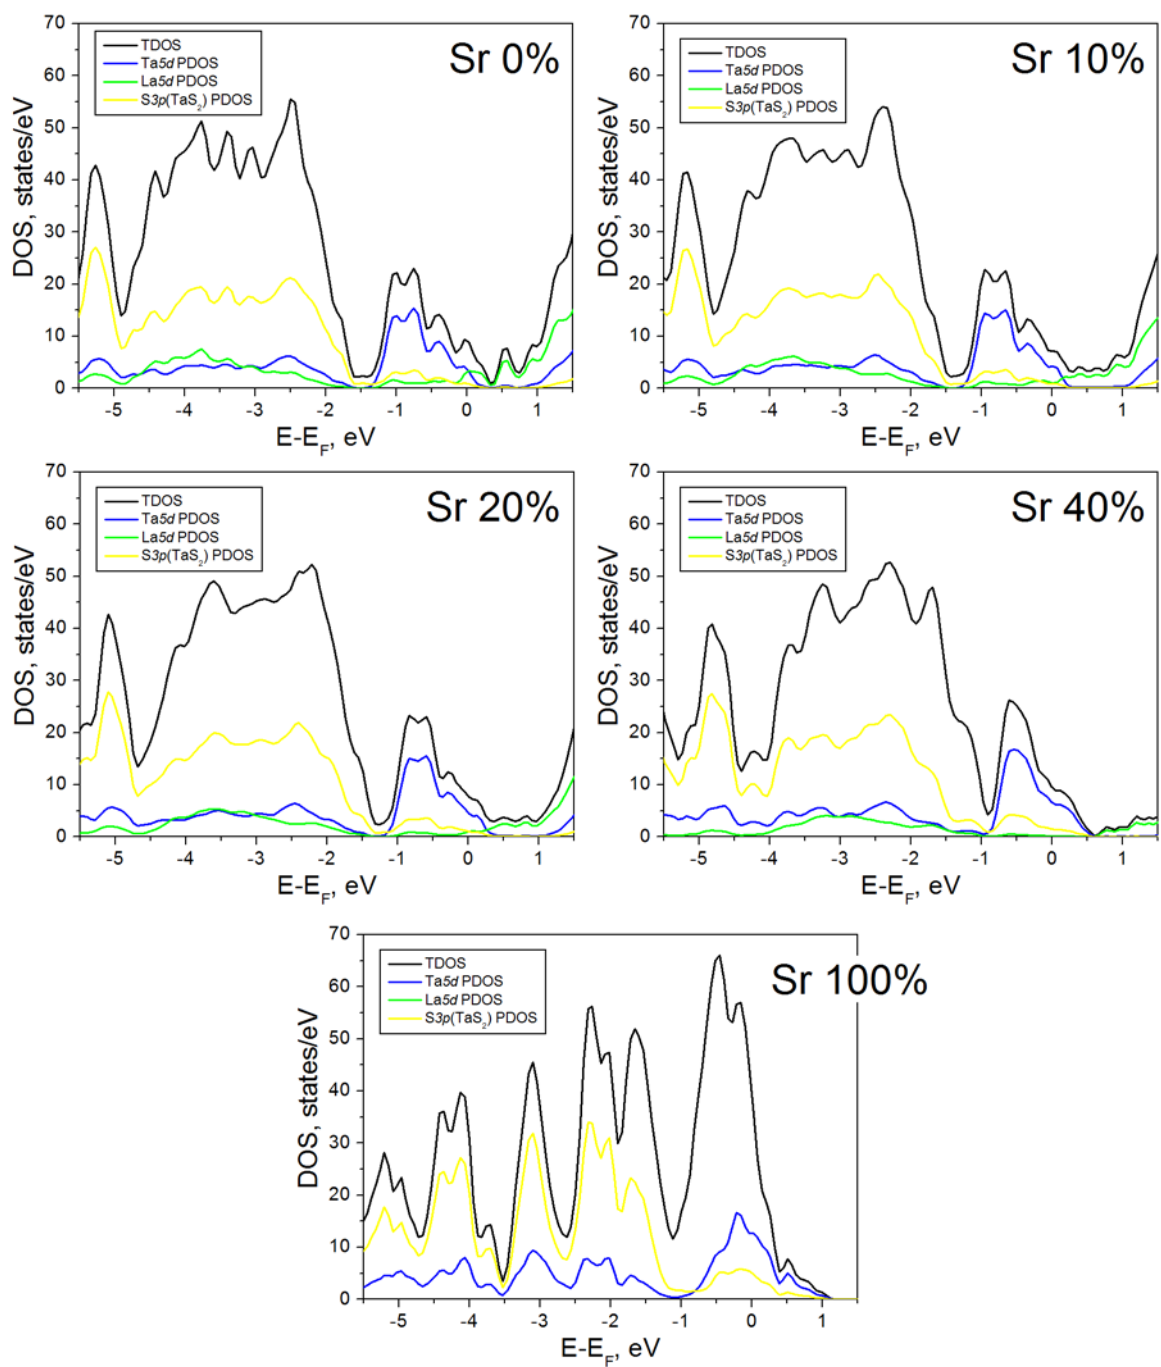

**Figure S4.** Total and selected partial densities-of-states (DOS) for  $\text{Sr}_x\text{La}_{1-x}\text{S-TaS}_2$  misfits with different Sr content. DFT calculations.
